# Supplementary material
Source: Springer Nature journal article supplement (https://www.springermedizin.de/resource/supplementary/13058_2010_9505_MOESM18_ESM.pdf/9702284)

(a)

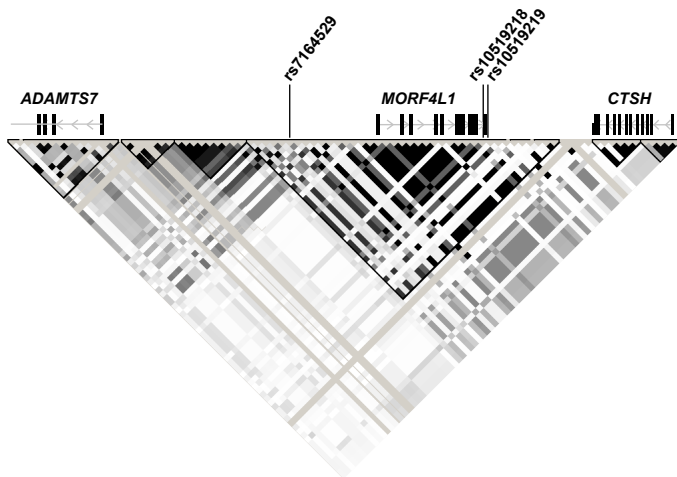

(b)

rs7164529-GA

EMBRACE  
GEMO  
HEBON  
CONSTIT TEAM  
kConFab  
SWE-BRCA  
BCFR  
CSMC  
UPENN  
Mayo  
DKFZ  
HEBCS  
PBCC  
FCCC  
GEORGETOWN

*BRCA1*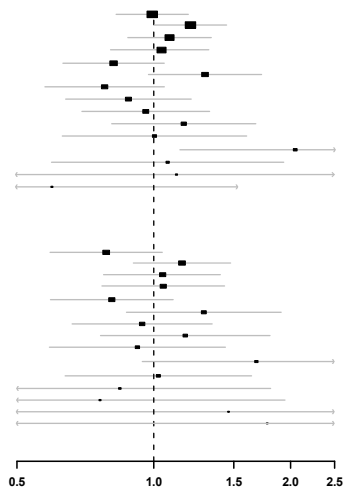

rs7164529-AA

EMBRACE  
GEMO  
HEBON  
CONSTIT TEAM  
kConFab  
SWE-BRCA  
BCFR  
CSMC  
UPENN  
Mayo  
DKFZ  
HEBCS  
PBCC  
FCCC  
GEORGETOWN

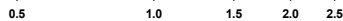

rs10519219-TC

EMBRACE  
GEMO  
HEBON  
CONSTIT TEAM  
kConFab  
SWE-BRCA  
BCFR  
HEBCS

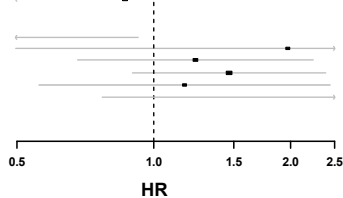

rs10519219-CC

EMBRACE  
GEMO  
HEBON  
CONSTIT  
kConFab  
SWE-BRCA  
BCFR  
HEBCS

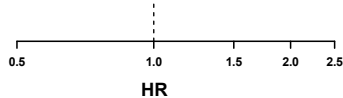

rs7164529-GA

EMBRACE  
GEMO  
HEBON  
CONSTIT TEAM  
kConFab  
SWE-BRCA  
BCFR  
CSMC  
UPENN  
Mayo  
DKFZ  
HEBCS  
PBCC  
FCCC  
GEORGETOWN  
HCSC  
ILUH

*BRCA2*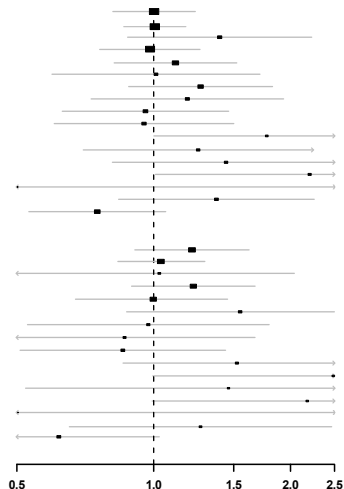

rs7164529-AA

EMBRACE  
GEMO  
HEBON  
kConFab  
CONSTIT TEAM  
SWE-BRCA  
BCFR  
CSMC  
UPENN  
Mayo  
DKFZ  
HEBCS  
PBCC  
FCCC  
HCSC  
ILUH

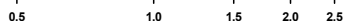

rs10519219-TC

EMBRACE  
GEMO  
HEBON  
CONSTIT TEAM  
kConFab  
SWE-BRCA  
BCFR  
HEBCS

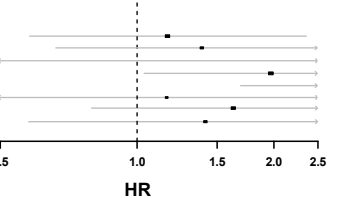

rs10519219-CC

EMBRACE  
GEMO  
HEBON  
CONSTIT  
kConFab  
SWE-BRCA  
BCFR  
HEBCS

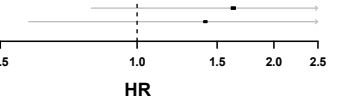

Supplement: MOESM18 [file 9702284]
